# Supplementary material for: Identification of solute carrier family genes related to the prognosis and tumor-infiltrating immune cells of pancreatic ductal adenocarcinoma
Source: PubMed Central journal article supplement — Ann Transl Med. 2022 Jan;10(2):57. doi: 10.21037/atm-21-6341 (PMC8848431; doi:10.21037/atm-21-6341), 2022-01
Supplement: atm-10-02-57-supplementary.pdf [file atm-10-02-57-supplementary.pdf]

**Table S1** The result of prognostic value of clinical variables<sup>a</sup>

| Variables                                    | Event of patients (n=112) | OS         |                     |         |
|----------------------------------------------|---------------------------|------------|---------------------|---------|
|                                              |                           | MST (days) | HR (95% CI)         | P value |
| Age (years)                                  |                           |            |                     |         |
| ≤60                                          | 20/38                     | 775.1      | 1                   |         |
| >60                                          | 49/74                     | 550.7      | 1.636 (0.962–2.780) | 0.066   |
| Gender                                       |                           |            |                     |         |
| Female                                       | 36/53                     | 587.4      | 1                   |         |
| Male                                         | 33/59                     | 630.7      | 0.855 (0.529–1.382) | 0.523   |
| Alcohol history <sup>b</sup>                 |                           |            |                     |         |
| No                                           | 25/43                     | 678.2      | 1                   |         |
| Yes                                          | 38/61                     | 559.6      | 1.276 (0.765–2.128) | 0.349   |
| History of chronic pancreatitis <sup>c</sup> |                           |            |                     |         |
| No                                           | 47/79                     | 650.9      | 1                   |         |
| Yes                                          | 7/9                       | 487.4      | 1.335 (0.600–2.970) | 0.478   |
| Tumor size <sup>d</sup>                      |                           |            |                     |         |
| ≤4                                           | 48/80                     | 517        | 1                   |         |
| >4                                           | 21/30                     | 614.7      | 1.002 (0.593–1.694) | 0.993   |
| Pathologic stage                             |                           |            |                     |         |
| I                                            | 4/8                       | 528.5      | 1                   |         |
| II                                           | 65/104                    | 616.4      | 1.038 (0.375–2.872) | 0.943   |
| Neoplasm histologic grade                    |                           |            |                     |         |
| G1 + G2                                      | 45/80                     | 696.8      | 1                   |         |
| G3 + G4                                      | 24/32                     | 433.4      | 2.267 (0.962–5.341) | 0.010   |
| Targeted molecular therapy <sup>e</sup>      |                           |            |                     |         |
| No                                           | 24/29                     | 253.0      | 1                   |         |
| Yes                                          | 41/73                     | 737.4      | 1.068 (0.095–0.296) | <0.001  |
| Radiation therapy <sup>f</sup>               |                           |            |                     |         |
| No                                           | 48/70                     | 561.8      | 1                   |         |
| Yes                                          | 12/30                     | 705.1      | 0.527 (0.293–0.947) | 0.029   |
| Residual resection <sup>g</sup>              |                           |            |                     |         |
| R0                                           | 39/66                     | 700.8      | 1                   |         |
| R1 + R2                                      | 29/44                     | 432.4      | 1.945 (1.174–3.223) | 0.009   |

Italic P values indicate statistically significant. <sup>a</sup>, part of data in this table also have been shown in our previous publication; <sup>b</sup>, alcohol history is unavailable in 8 patients; <sup>c</sup>, history of chronic pancreatitis is unavailable in 24 patients; <sup>d</sup>, tumor size is unavailable in 2 patients; <sup>e</sup>, targeted molecular therapy information is unavailable in 10 patients; <sup>f</sup>, radiation therapy is unavailable in 12 patients; <sup>g</sup>, residual resection is unavailable in 10 patients. HR, hazard ratio; MST, mean survival days; OS, overall survival; PDAC, pancreatic ductal adenocarcinoma; HR, hazard ratio; CI, confidence interval.

**Table S2** The results of prognostic value from low- and high-expression groups of each SLC in PDAC patients' OS

| Gene symbol  | P value |
|--------------|---------|
| SLC10A1      | 0.646   |
| SLC10A2      | 0.516   |
| SLC10A3      | 0.032   |
| SLC10A4      | 0.183   |
| SLC10A5      | 0.722   |
| SLC10A6      | 0.766   |
| SLC10A7      | 0.890   |
| SLC11A1      | 0.167   |
| SLC11A2      | 0.522   |
| SLC12A1      | 0.328   |
| SLC12A2      | 0.419   |
| SLC12A3      | 0.216   |
| SLC12A4      | 0.057   |
| SLC12A5      | 0.942   |
| SLC12A6      | 0.135   |
| SLC12A7      | 0.918   |
| SLC12A8      | 0.081   |
| SLC12A9      | 0.615   |
| SLC13A1      | 0.404   |
| SLC13A2      | 0.126   |
| SLC13A3      | 0.464   |
| SLC13A4      | 0.619   |
| SLC13A5      | 0.412   |
| SLC14A1      | 0.722   |
| SLC14A2      | 0.546   |
| SLC14A2-AS1  | 0.322   |
| SLC15A1      | 0.375   |
| SLC15A2      | 0.553   |
| SLC15A3      | 0.109   |
| SLC15A4      | 0.337   |
| SLC16A1      | 0.996   |
| SLC16A10     | 0.998   |
| SLC16A11     | 0.272   |
| SLC16A12     | 0.959   |
| SLC16A13     | 0.268   |
| SLC16A14     | 0.052   |
| SLC16A1-AS1  | 0.649   |
| SLC16A2      | 0.131   |
| SLC16A3      | 0.259   |
| SLC16A4      | 0.713   |
| SLC16A5      | 0.466   |
| SLC16A6      | 0.325   |
| SLC16A6P1    | 0.933   |
| SLC16A7      | 0.131   |
| SLC16A8      | 0.283   |
| SLC16A9      | 0.794   |
| SLC17A1      | 0.531   |
| SLC17A2      | 0.469   |
| SLC17A3      | 0.939   |
| SLC17A4      | 0.471   |
| SLC17A5      | 0.867   |
| SLC17A6      | 0.468   |
| SLC17A7      | 0.636   |
| SLC17A8      | 0.607   |
| SLC17A9      | 0.704   |
| SLC18A1      | 0.106   |
| SLC18A2      | 0.647   |
| SLC18A3      | 0.868   |
| SLC18B1      | 0.376   |
| SLC19A1      | 0.876   |
| SLC19A2      | 0.303   |
| SLC19A3      | 0.002   |
| SLC1A1       | 0.561   |
| SLC1A2       | 0.733   |
| SLC1A3       | 0.178   |
| SLC1A4       | 0.451   |
| SLC1A5       | 0.994   |
| SLC1A6       | 0.792   |
| SLC1A7       | 0.129   |
| SLC20A1      | 0.584   |
| SLC20A2      | 0.556   |
| SLC22A1      | 0.982   |
| SLC22A10     | 0.425   |
| SLC22A11     | 0.269   |
| SLC22A13     | 0.999   |
| SLC22A14     | 0.016   |
| SLC22A15     | 0.445   |
| SLC22A16     | 0.131   |
| SLC22A17     | 0.100   |
| SLC22A18     | 0.985   |
| SLC22A18AS   | 0.631   |
| SLC22A2      | 0.859   |
| SLC22A20     | 0.654   |
| SLC22A23     | 0.001   |
| SLC22A3      | 0.355   |
| SLC22A31     | 0.618   |
| SLC22A4      | 0.027   |
| SLC22A5      | 0.726   |
| SLC22A7      | 0.972   |
| SLC22A9      | 0.747   |
| SLC23A1      | 0.387   |
| SLC23A2      | 0.095   |
| SLC23A3      | 0.694   |
| SLC24A1      | 0.344   |
| SLC24A2      | 0.210   |
| SLC24A3      | 0.059   |
| SLC24A4      | -0.001  |
| SLC25A1      | 0.234   |
| SLC25A10     | 0.209   |
| SLC25A11     | 0.036   |
| SLC25A12     | 0.852   |
| SLC25A13     | 0.162   |
| SLC25A14     | 0.504   |
| SLC25A14P1   | 0.803   |
| SLC25A15     | 0.959   |
| SLC25A16     | 0.919   |
| SLC25A17     | 0.085   |
| SLC25A18     | 0.375   |
| SLC25A19     | 0.122   |
| SLC25A1P1    | 0.240   |
| SLC25A1P5    | 0.306   |
| SLC25A2      | 0.751   |
| SLC25A20     | 0.956   |
| SLC25A21     | 0.948   |
| SLC25A21-AS1 | 0.283   |
| SLC25A22     | 0.018   |
| SLC25A23     | 0.784   |
| SLC25A24     | 0.481   |
| SLC25A24P1   | 0.736   |
| SLC25A25     | 0.164   |
| SLC25A25-AS1 | 0.919   |
| SLC25A26     | 0.184   |
| SLC25A27     | 0.664   |
| SLC25A28     | 0.628   |
| SLC25A29     | 0.744   |
| SLC25A3      | 0.329   |
| SLC25A30     | 0.669   |
| SLC25A30-AS1 | 0.534   |
| SLC25A32     | 0.078   |
| SLC25A33     | 0.925   |
| SLC25A34     | 0.105   |
| SLC25A35     | 0.504   |
| SLC25A36     | 0.390   |
| SLC25A36P1   | 0.126   |
| SLC25A37     | 0.810   |
| SLC25A38     | 0.468   |
| SLC25A39     | 0.010   |
| SLC25A39P1   | 0.712   |
| SLC25A3P1    | 0.984   |
| SLC25A4      | 0.370   |
| SLC25A40     | 0.602   |
| SLC25A41     | 0.499   |
| SLC25A42     | 0.658   |
| SLC25A43     | 0.188   |
| SLC25A44     | 0.118   |
| SLC25A45     | 0.371   |
| SLC25A46     | 0.363   |
| SLC25A47     | 0.962   |
| SLC25A48     | 0.838   |
| SLC25A5      | 0.188   |
| SLC25A51     | 0.009   |
| SLC25A52     | 0.564   |
| SLC25A53     | 0.112   |
| SLC25A5-AS1  | 0.053   |
| SLC25A5P1    | 0.731   |
| SLC25A5P3    | 0.977   |
| SLC25A5P5    | 0.480   |
| SLC25A6      | 0.890   |
| SLC25A6P2    | 0.836   |
| SLC26A1      | 0.677   |
| SLC26A10     | 0.049   |
| SLC26A11     | 0.740   |
| SLC26A2      | 0.084   |
| SLC26A3      | 0.128   |
| SLC26A4      | 0.758   |
| SLC26A4-AS1  | 0.547   |
| SLC26A5      | 0.611   |
| SLC26A6      | 0.673   |
| SLC26A7      | 0.656   |
| SLC26A8      | 0.396   |
| SLC26A9      | 0.534   |
| SLC27A1      | 0.926   |
| SLC27A2      | 0.966   |
| SLC27A3      | 0.688   |
| SLC27A4      | 0.086   |
| SLC27A5      | 0.615   |
| SLC27A6      | 0.297   |
| SLC28A1      | 0.955   |
| SLC28A2      | 0.022   |
| SLC28A3      | 0.647   |
| SLC29A1      | 0.623   |
| SLC29A2      | 0.564   |
| SLC29A3      | 0.119   |
| SLC29A4      | 0.811   |
| SLC2A1       | 0.455   |
| SLC2A10      | 0.256   |
| SLC2A11      | 0.847   |
| SLC2A12      | 0.100   |
| SLC2A13      | 0.245   |
| SLC2A14      | 0.161   |
| SLC2A1-AS1   | 0.781   |
| SLC2A2       | 0.856   |
| SLC2A3       | 0.993   |
| SLC2A3P2     | 0.462   |
| SLC2A3P4     | 0.244   |
| SLC2A4       | 0.255   |
| SLC2A4FRG    | 0.382   |
| SLC2A5       | 0.003   |
| SLC2A6       | 0.151   |
| SLC2A7       | 0.356   |
| SLC2A8       | 0.256   |
| SLC2A9       | 0.006   |
| SLC30A1      | 0.539   |
| SLC30A10     | 0.217   |
| SLC30A2      | 0.587   |
| SLC30A3      | 0.319   |

**Table S2** (continued)

**Table S2** (continued)

| Gene symbol | P value |
|-------------|---------|
| SLC30A4     | 0.012   |
| SLC30A5     | 0.639   |
| SLC30A6     | 0.810   |
| SLC30A7     | 0.738   |
| SLC30A8     | 0.877   |
| SLC30A9     | 0.068   |
| SLC31A1     | 0.894   |
| SLC31A1P1   | 0.873   |
| SLC31A2     | 0.003   |
| SLC32A1     | 0.576   |
| SLC33A1     | 0.550   |
| SLC34A1     | 0.313   |
| SLC34A2     | 0.311   |
| SLC34A3     | 0.279   |
| SLC35A1     | 0.292   |
| SLC35A2     | 0.222   |
| SLC35A3     | 0.457   |
| SLC35A4     | 0.665   |
| SLC35A5     | 0.930   |
| SLC35B1     | 0.372   |
| SLC35B2     | 0.015   |
| SLC35B3     | 0.432   |
| SLC35B4     | 0.029   |
| SLC35C1     | 0.626   |
| SLC35C2     | 0.260   |
| SLC35D1     | 0.304   |
| SLC35D2     | 0.520   |
| SLC35D3     | 0.758   |
| SLC35E1     | 0.979   |
| SLC35E1P1   | 0.365   |
| SLC35E2     | 0.030   |
| SLC35E2B    | 0.741   |
| SLC35E3     | 0.237   |
| SLC35E4     | 0.087   |
| SLC35F1     | 0.396   |
| SLC35F2     | 0.214   |
| SLC35F3     | 0.401   |
| SLC35F4     | 0.715   |
| SLC35F5     | 0.482   |
| SLC35F6     | 0.857   |
| SLC35G1     | 0.823   |
| SLC35G2     | 0.784   |
| SLC35G5     | 0.766   |
| SLC35G6     | 0.880   |
| SLC36A1     | 0.068   |
| SLC36A2     | 0.229   |
| SLC36A4     | 0.803   |
| SLC37A1     | 0.618   |
| SLC37A2     | 0.215   |
| SLC37A3     | 0.827   |
| SLC37A4     | 0.842   |
| SLC38A1     | 0.922   |
| SLC38A10    | 0.890   |
| SLC38A11    | 0.001   |
| SLC38A2     | 0.473   |
| SLC38A3     | 0.408   |
| SLC38A4     | 0.701   |
| SLC38A5     | 0.223   |
| SLC38A6     | 0.461   |
| SLC38A7     | 0.494   |
| SLC38A8     | 0.062   |
| SLC38A9     | 0.441   |
| SLC39A1     | 0.444   |
| SLC39A10    | 0.116   |
| SLC39A11    | 0.030   |
| SLC39A12    | 0.968   |
| SLC39A13    | 0.485   |
| SLC39A14    | 0.698   |
| SLC39A2     | 0.315   |
| SLC39A3     | 0.192   |
| SLC39A4     | 0.289   |
| SLC39A5     | 0.949   |
| SLC39A6     | 0.204   |
| SLC39A7     | 0.712   |
| SLC39A8     | 0.857   |
| SLC39A9     | 0.050   |
| SLC3A1      | 0.520   |
| SLC3A2      | 0.114   |
| SLC40A1     | 0.276   |
| SLC41A1     | 0.375   |
| SLC41A2     | 0.402   |
| SLC41A3     | 0.295   |
| SLC43A1     | 0.513   |
| SLC43A2     | 0.580   |
| SLC43A3     | 0.508   |
| SLC44A1     | 0.921   |
| SLC44A2     | 0.001   |
| SLC44A3     | 0.812   |
| SLC44A4     | 0.789   |
| SLC44A5     | 0.267   |
| SLC45A1     | 0.396   |
| SLC45A2     | 0.230   |
| SLC45A3     | 0.943   |
| SLC45A4     | 0.044   |
| SLC46A1     | 0.674   |
| SLC46A2     | 0.015   |
| SLC46A3     | 0.101   |
| SLC47A1     | <0.001  |
| SLC47A1P1   | 0.396   |
| SLC47A2     | 0.186   |
| SLC48A1     | 0.141   |
| SLC4A1      | 0.786   |
| SLC4A10     | 0.214   |
| SLC4A11     | 0.033   |
| SLC4A11AP   | 0.571   |
| SLC4A11APP1 | 0.808   |
| SLC4A2      | 0.633   |
| SLC4A3      | 0.314   |
| SLC4A4      | 0.798   |
| SLC4A5      | 0.582   |
| SLC4A7      | 0.026   |
| SLC4A8      | 0.088   |
| SLC4A9      | 0.642   |
| SLC50A1     | 0.185   |
| SLC51A      | 0.425   |
| SLC51B      | 0.517   |
| SLC52A1     | 0.044   |
| SLC52A2     | 0.050   |
| SLC52A3     | 0.201   |
| SLC5A1      | 0.461   |
| SLC5A10     | 0.958   |
| SLC5A11     | 0.541   |
| SLC5A12     | 0.204   |
| SLC5A2      | 0.968   |
| SLC5A3      | 0.569   |
| SLC5A4      | 0.302   |
| SLC5A5      | 0.564   |
| SLC5A6      | 0.362   |
| SLC5A7      | 0.469   |
| SLC5A8      | 0.662   |
| SLC5A9      | 0.972   |
| SLC6A1      | 0.121   |
| SLC6A11     | 0.182   |
| SLC6A12     | 0.977   |
| SLC6A13     | 0.137   |
| SLC6A14     | 0.139   |
| SLC6A15     | 0.594   |
| SLC6A16     | 0.785   |
| SLC6A17     | 0.267   |
| SLC6A18     | 0.121   |
| SLC6A19     | 0.227   |
| SLC6A1-AS1  | 0.049   |
| SLC6A2      | 0.729   |
| SLC6A20     | 0.366   |
| SLC6A21P    | 0.315   |
| SLC6A3      | 0.359   |
| SLC6A4      | 0.253   |
| SLC6A6      | 0.151   |
| SLC6A7      | 0.979   |
| SLC6A8      | 0.421   |
| SLC6A9      | 0.978   |
| SLC7A1      | 0.584   |
| SLC7A10     | 0.829   |
| SLC7A11     | 0.663   |
| SLC7A11-AS1 | 0.223   |
| SLC7A13     | 0.641   |
| SLC7A14     | 0.261   |
| SLC7A2      | 0.238   |
| SLC7A3      | 0.242   |
| SLC7A4      | 0.323   |
| SLC7A5      | 0.118   |
| SLC7A5P1    | 0.959   |
| SLC7A6      | 0.138   |
| SLC7A6OS    | 0.036   |
| SLC7A7      | 0.492   |
| SLC7A8      | 0.146   |
| SLC7A9      | 0.573   |
| SLC8A1      | 0.055   |
| SLC8A1-AS1  | 0.736   |
| SLC8A2      | 0.504   |
| SLC8A3      | 0.577   |
| SLC8B1      | 0.468   |
| SLC9A1      | 0.186   |
| SLC9A2      | 0.179   |
| SLC9A3      | 0.071   |
| SLC9A3R1    | 0.729   |
| SLC9A3R2    | 0.248   |
| SLC9A4      | 0.239   |
| SLC9A5      | 0.370   |
| SLC9A6      | 0.692   |
| SLC9A7      | 0.903   |
| SLC9A7P1    | 0.495   |
| SLC9A8      | 0.368   |
| SLC9A9      | 0.248   |
| SLC9B1      | 0.980   |
| SLC9B2      | 0.512   |
| SLC9C1      | 0.734   |
| SLC9C2      | 0.126   |
| SLCO1A2     | 0.243   |
| SLCO1B1     | 0.398   |
| SLCO1B3     | 0.192   |
| SLCO1B7     | 0.082   |
| SLCO1C1     | 0.617   |
| SLCO2A1     | 0.436   |
| SLCO2B1     | 0.002   |
| SLCO3A1     | 0.157   |
| SLCO4A1     | 0.438   |
| SLCO4A1-AS1 | 0.759   |
| SLCO4C1     | 0.076   |
| SLCO5A1     | 0.020   |

SLC, solute carrier; PDAC, pancreatic ductal adenocarcinoma; OS, overall survival.

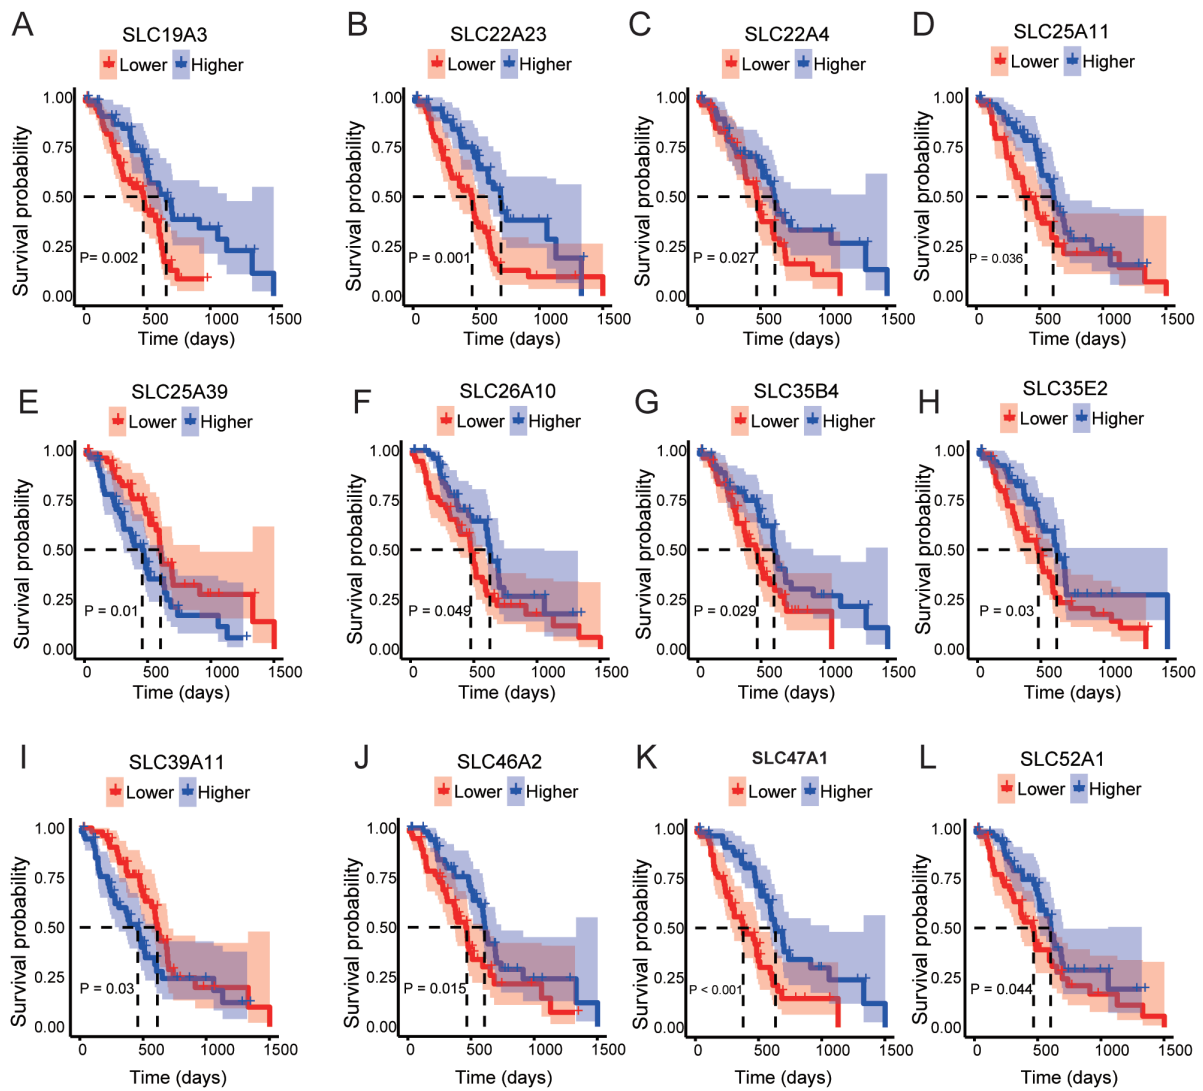

**Figure S1** Kaplan-Meier survival curves for SLC genes in PDAC. Overall Survival stratified by (A) *SLC19A3*; (B) *SLC22A23*; (C) *SLC22A4*; (D) *SLC25A11*; (E) *SLC25A39*; (F) *SLC26A10*; (G) *SLC35B4*; (H) *SLC35E2*; (I) *SLC39A11*; (J) *SLC46A2*; (K) *SLC47A1*; (L) *SLC52A1*. SLC, solute carrier; PDAC, pancreatic ductal adenocarcinoma.

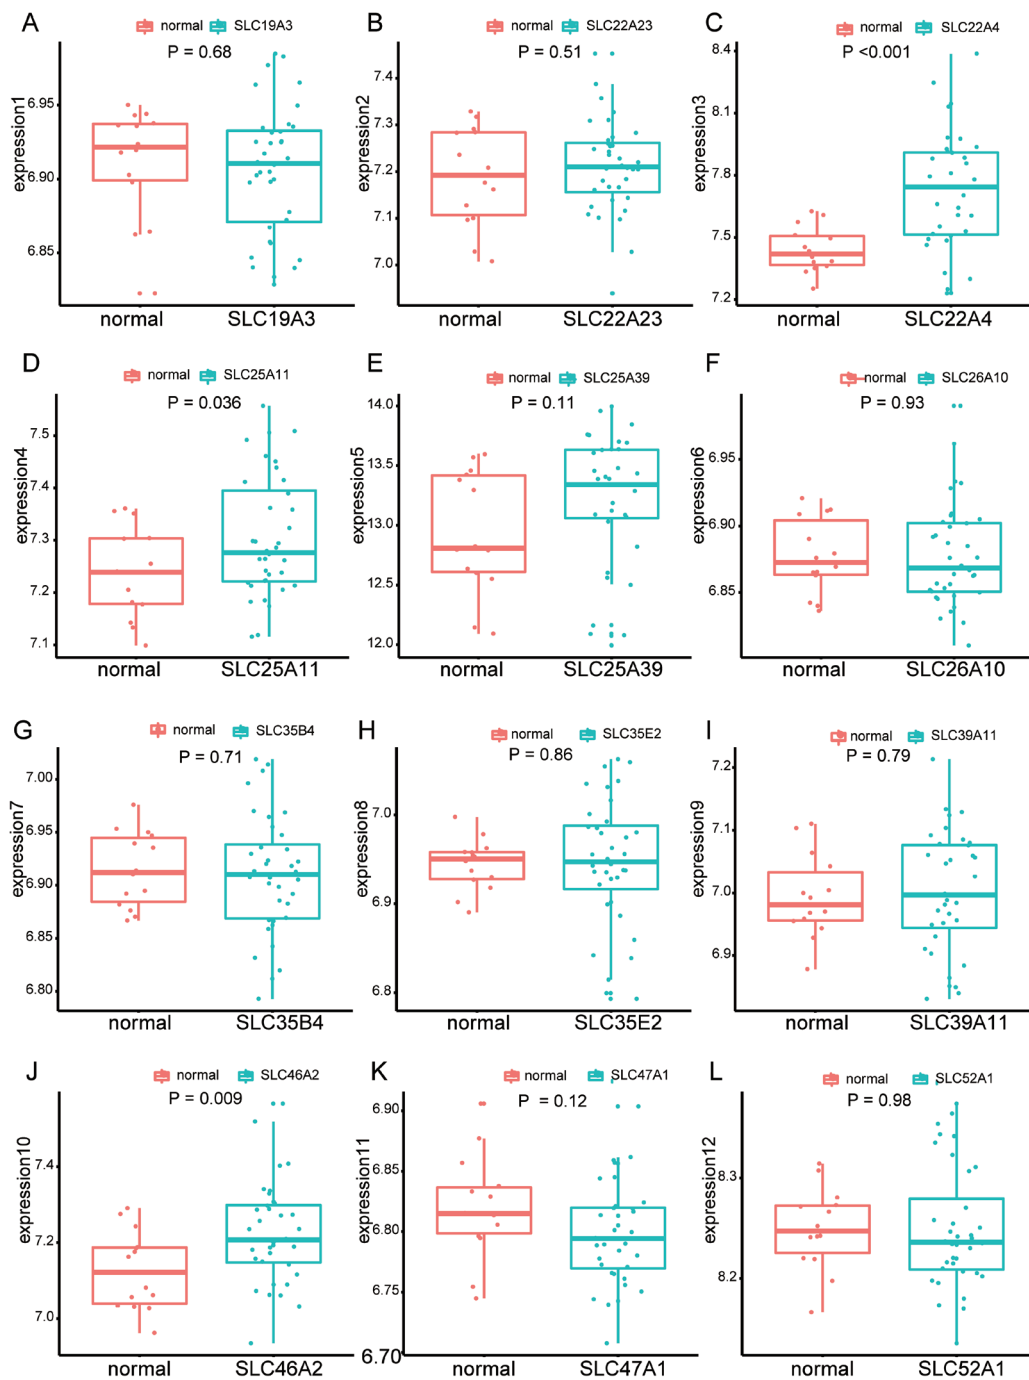

**Figure S2** Gene expression level distribution of SLC genes in PDAC peripheral blood and normal peripheral blood of GSE49641. (A) *SLC19A3*; (B) *SLC22A23*; (C) *SLC22A4*; (D) *SLC25A11*; (E) *SLC25A39*; (F) *SLC26A10*; (G) *SLC35B4*; (H) *SLC35E2*; (I) *SLC39A11*; (J) *SLC46A2*; (K) *SLC47A1*; (L) *SLC52A1*. SLC, solute carrier; PDAC, pancreatic ductal adenocarcinoma.

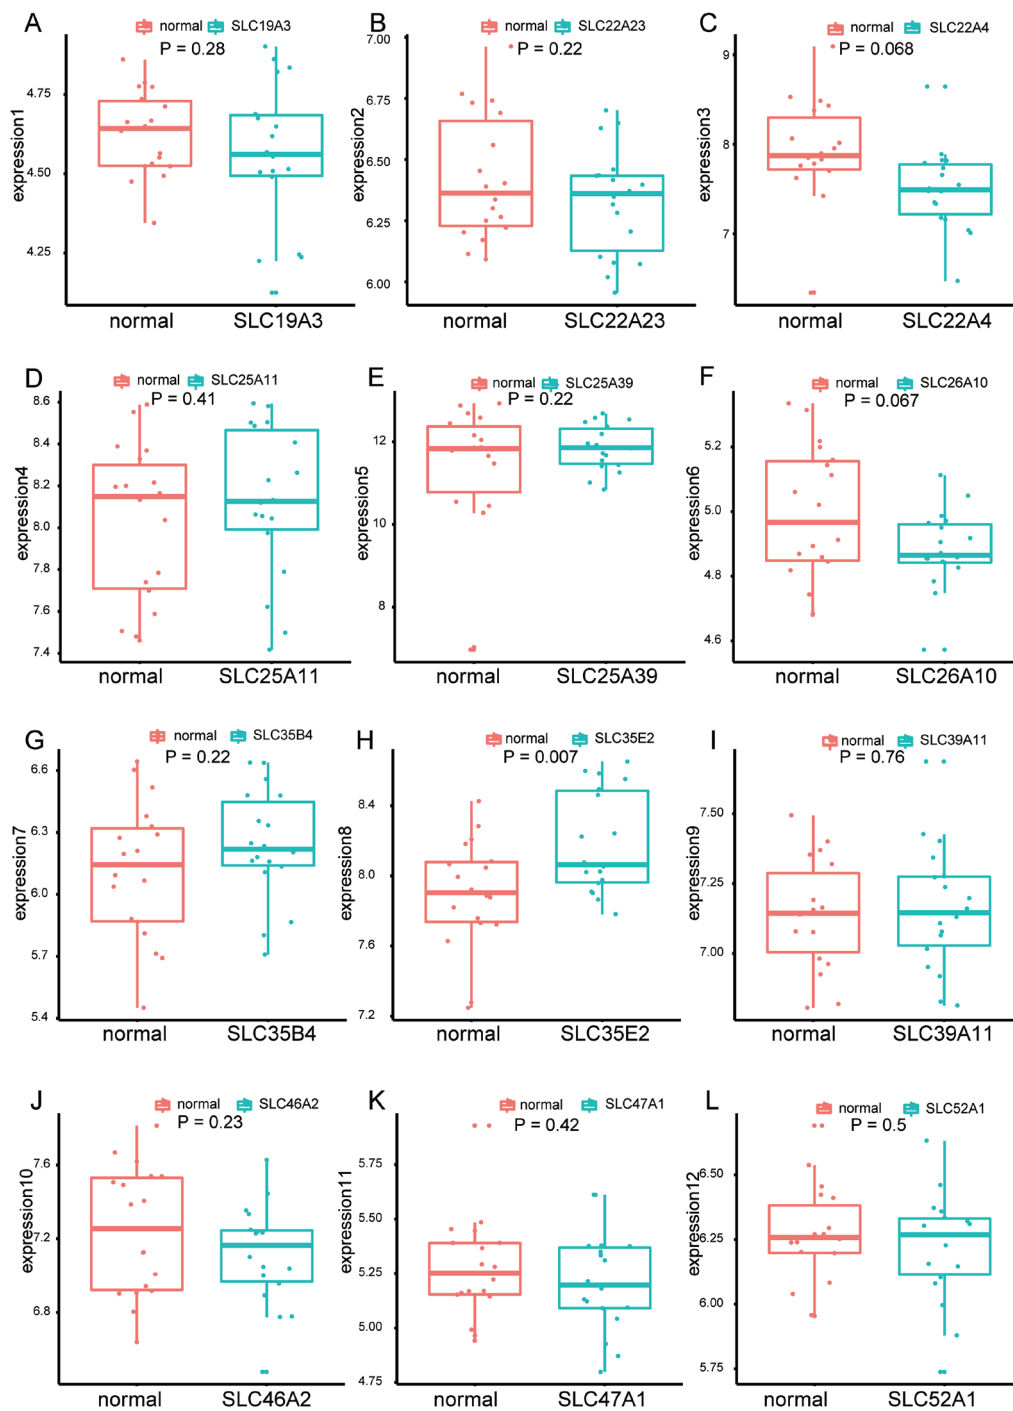

**Figure S3** Gene expression level distribution of SLC genes in PDAC peripheral blood and normal peripheral blood of GSE49641. (A) *SLC19A3*; (B) *SLC22A23*; (C) *SLC22A4*; (D) *SLC25A11*; (E) *SLC25A39*; (F) *SLC26A10*; (G) *SLC35B4*; (H) *SLC35E2*; (I) *SLC39A11*; (J) *SLC46A2*; (K) *SLC47A1*; (L) *SLC52A1*. SLC, solute carrier; PDAC, pancreatic ductal adenocarcinoma.
